# Supplementary material for: Utilization of Health Care Services and Accessibility Challenges among Adults Aged 50+ before and after Austerity Measures across 27 European Countries: Secular Trends in the SHARE Study from 2004/05 to 2019/20
Source: MDPI journal article supplement (doi:10.3390/healthcare12090928), 2024-04-30
Supplement: s1 [file s1]

## Supplementary Materials

**Table S1.** Score frequency of lack of Accessibility - Availability in Health Care Services (LAAHCS) in relation to characteristics of 46,105 Europeans adults aged 50+ years.

|                                |                                 |        | Score frequency of lack of<br>Accessibility - Availability in<br>Health Care Services <sup>a</sup> |                   |              |         |
|--------------------------------|---------------------------------|--------|----------------------------------------------------------------------------------------------------|-------------------|--------------|---------|
|                                |                                 |        | 0<br>n=40,728                                                                                      | 1 to 24<br>n=4874 | 25+<br>n=503 |         |
| n                              |                                 |        | weighted %                                                                                         |                   |              | p-value |
| Gender                         | ♂                               | 19,641 | 88.8                                                                                               | 10.3              | 0.9          | <0.001  |
|                                | ♀                               | 26,464 | 85.5                                                                                               | 13.3              | 1.1          |         |
| Age, years                     | 50-59                           | 4696   | 85.1                                                                                               | 14.2              | 0.7          | 0.088   |
|                                | 60-69                           | 16,208 | 87.4                                                                                               | 11.6              | 1.0          |         |
|                                | 70-79                           | 15,601 | 88.2                                                                                               | 10.6              | 1.2          |         |
|                                | 80-89                           | 8164   | 87.5                                                                                               | 11.4              | 1.1          |         |
|                                | 90-104                          | 1436   | 84.6                                                                                               | 14.3              | 1.1          |         |
| Education, years               | 0                               | 1549   | 83.5                                                                                               | 15.4              | 1.1          | 0.015   |
|                                | 1-7                             | 6721   | 84.4                                                                                               | 14.1              | 1.4          |         |
|                                | 8-12                            | 24,766 | 87.4                                                                                               | 11.5              | 1.1          |         |
|                                | 13+                             | 13,069 | 88.5                                                                                               | 11.0              | 0.5          |         |
| Family status                  | unmarried, divorced, widow      | 5911   | 83.5                                                                                               | 14.2              | 2.3          | <0.001  |
|                                | married, living with partner    | 40,194 | 87.6                                                                                               | 11.6              | 0.8          |         |
| Occupation                     | employed                        | 9619   | 87.1                                                                                               | 12.3              | 0.6          | 0.017   |
|                                | unemployed, retired, housemaker | 36,486 | 87.0                                                                                               | 11.8              | 1.2          |         |
| Chronic conditions or diseases | none                            | 11,921 | 89.4                                                                                               | 10.0              | 0.6          | <0.001  |
|                                | 1                               | 12,890 | 87.0                                                                                               | 11.8              | 1.2          |         |
|                                | 2                               | 10,085 | 87.2                                                                                               | 12.0              | 0.8          |         |
|                                | 3+                              | 11,209 | 83.5                                                                                               | 14.9              | 1.6          |         |

<sup>a</sup>Score range from 0 to 100, with a higher score indicating higher lack of Accessibility - Availability in Health Care Services.

$\chi^2$  tests.
